# Supplementary material
Source: PubMed Central journal article supplement (PMC6784725)

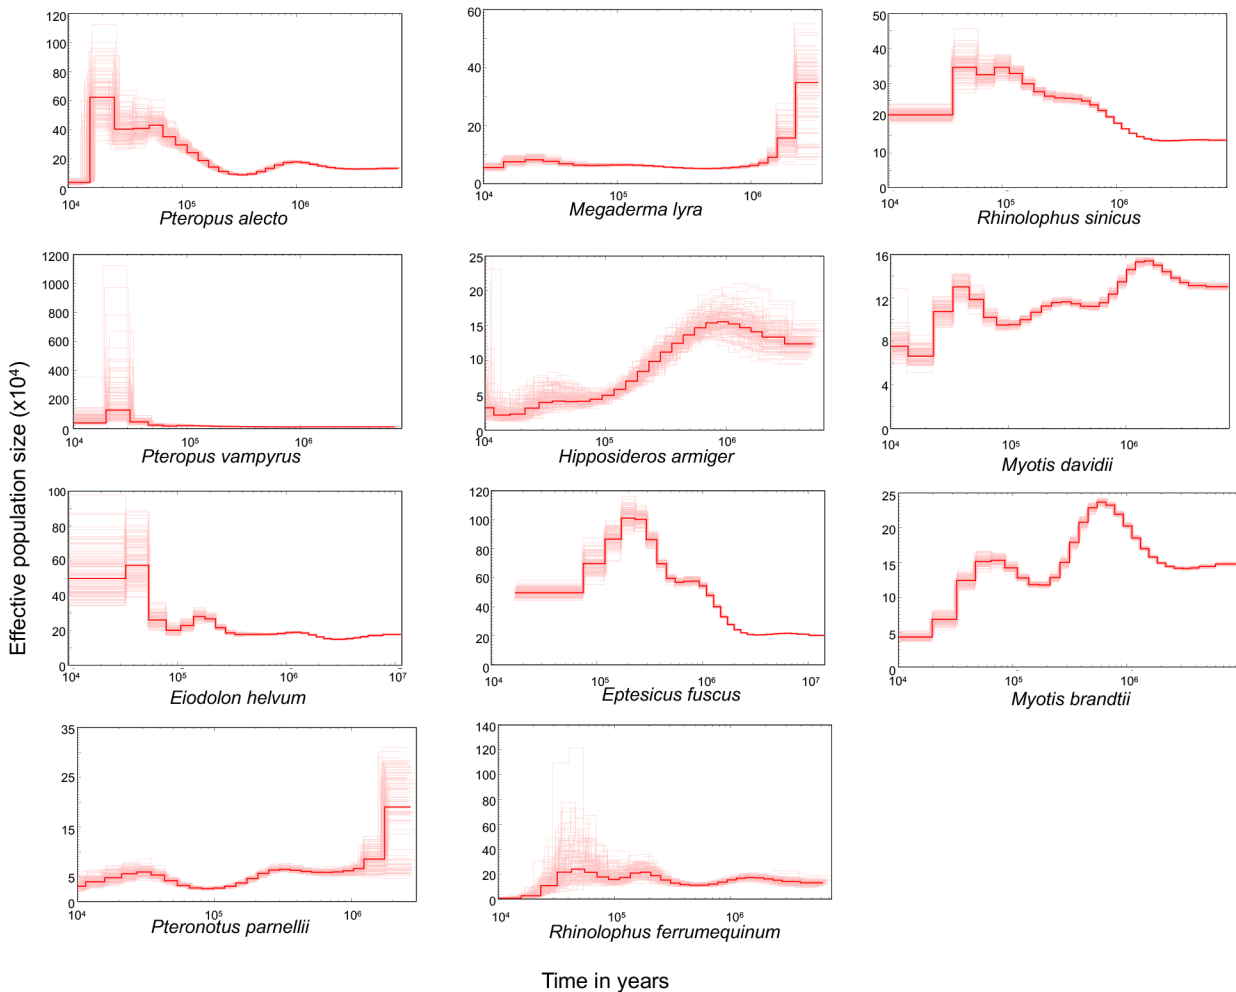

Supplement: rspb20190304supp4.pdf [file rspb20190304supp4.pdf]

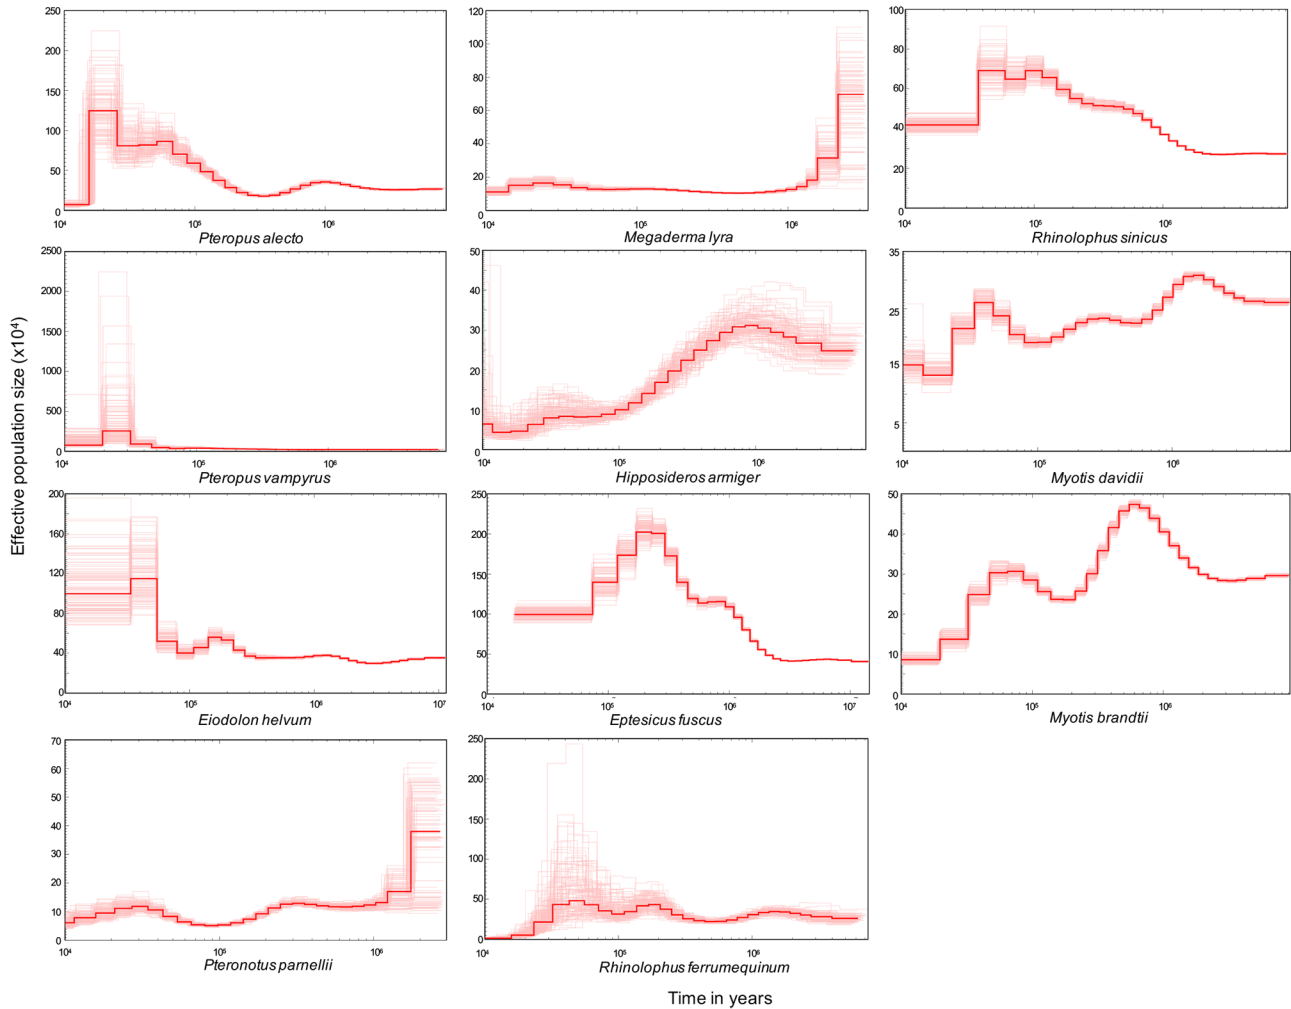

Supplement: rspb20190304supp5.pdf [file rspb20190304supp5.pdf]

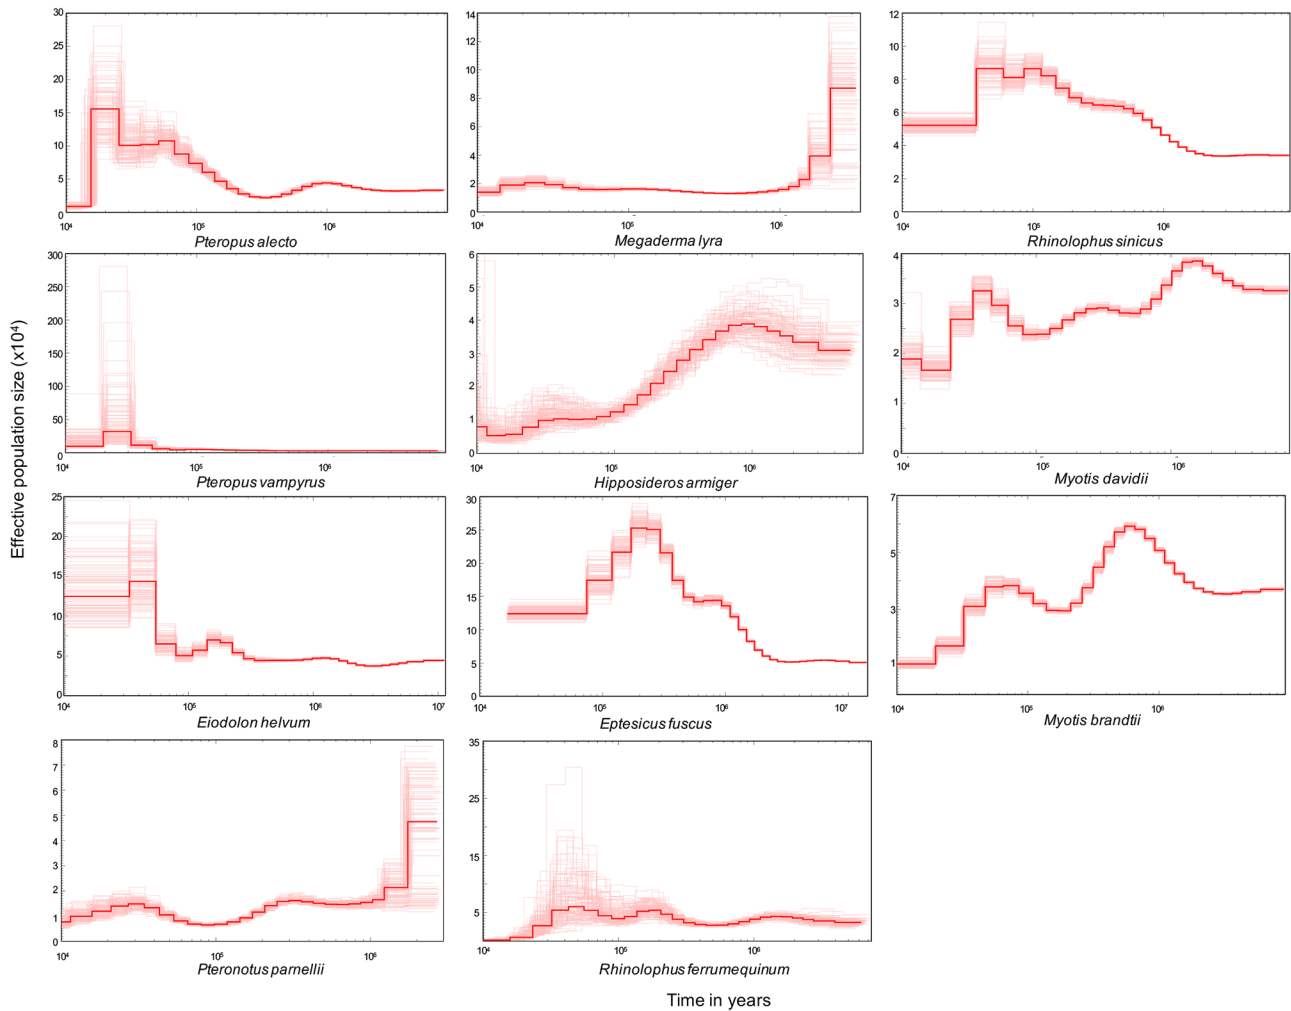

Supplement: rspb20190304supp6.pdf [file rspb20190304supp6.pdf]
